# Supplementary material
Source: publisher site journal article supplement (https://www.dovepress.com/article/471930)

| TABLE S1. Means, Standard Deviations, and Difference Scores for measurements after the exercise intervention | | | | | | | | | | | | | | | | | | | | | | | |
| --- | --- | --- | --- | --- | --- | --- | --- | --- | --- | --- | --- | --- | --- | --- | --- | --- | --- | --- | --- | --- | --- | --- | --- |
| **Variables** | **Control** | | | | |  | **Low intensity** | | | | |  | **Moderate intensity** | | | | |  | **High intensity** | | | | |
| **Test 2** | **Test 3** | **Test 4** | **DS1** | **DS2** |  | **Test 2** | **Test 3** | **Test 4** | **DS1** | **DS2** |  | **Test 2** | **Test 3** | **Test 4** | **DS1** | **DS2** |  | **Test 2** | **Test 3** | **Test 4** | **DS1** | **DS2** |
| 1-back reaction time (RTs, ms) | 543.73(63.75) | 512.93(77.86) | 476.62(65.22) | -30.81(36.85) | -67.12(42.92) |  | 635.31(96.68) | 564.33(96.25) | 566.95(88.71) | -70.98(47.45) | -68.36(64.44) | | 614.36(67.04) | 570.2(69.26) | 582.15(89.82) | -44.54(37.01) | -32.21(40.79) | | 609.29(56.21) | 595.56(59.68) | 539.39(57.89) | -13.73(52.76) | -69.91(56.41) |
| 1-back Omission Rate | 0.08(0.06) | 0.07(0.07) | 0.1(0.08) | -0.01(0.06) | 0.03(0.07) |  | 0.24(0.21) | 0.15(0.14) | 0.11(0.08) | -0.09(0.15) | -0.13(0.2) |  | 0.2(0.13) | 0.13(0.09) | 0.18(0.21) | -0.05(0.16) | -0.01(0.14) | | 0.11(0.1) | 0.1(0.11) | 0.11(0.08) | -0.02(0.09) | 0(0.11) |
| 1-back False Alarm Rate | 0.06(0.05) | 0.05(0.05) | 0.04(0.02) | -0.01(0.05) | -0.02(0.05) |  | 0.14(0.13) | 0.12(0.15) | 0.07(0.08) | -0.02(0.08) | -0.07(0.1) |  | 0.1(0.12) | 0.07(0.07) | 0.09(0.12) | -0.04(0.14) | -0.03(0.07) | | 0.11(0.1) | 0.07(0.07) | 0.04(0.03) | -0.05(0.09) | -0.07(0.1) |
| 1-back Index of discrimination (d') | 3.21(0.62) | 3.36(0.59) | 3.19(0.5) | 0.15(0.49) | -0.17(0.68) |  | 2.08(1.21) | 2.58(1.14) | 2.97(0.83) | 0.5(0.85) | 0.43(0.81) |  | 2.32(0.93) | 2.87(0.75) | 2.69(1.31) | 0.5(1.15) | -0.12(1.68) | | 2.78(0.91) | 3.07(0.92) | 3.15(0.61) | 0.39(0.76) | -0.02(0.79) |
| 3-back RTs (ms) | 2005.27(1390.84) | 1647.19(1105.56) | 1482.78(1061.41) | -407.6(405.03) | -533.16(519.2) |  | 1799.71(1200.44) | 1732.93(1475.48) | 1394.42(952.03) | -66.78(943.35) | -405.29(314.97) | | 2247.97(1185.19) | 2050.06(1587.23) | 1711.97(817.56) | -148.39(864.94) | -525.33(743.57) | | 2272.61(1247.84) | 1890.03(1020.96) | 1489.52(886.47) | -382.57(480.2) | -783.08(974.26) |
| 3-back Omission Rate | 0.14(0.15) | 0.13(0.14) | 0.13(0.21) | 0(0.08) | 0(0.12) |  | 0.15(0.15) | 0.06(0.09) | 0.07(0.07) | -0.08(0.11) | -0.08(0.1) |  | 0.14(0.13) | 0.09(0.09) | 0.13(0.14) | -0.06(0.09) | -0.02(0.13) | | 0.11(0.09) | 0.09(0.09) | 0.09(0.11) | -0.01(0.1) | -0.02(0.13) |
| 3-back False Alarm Rate | 0.05(0.04) | 0.05(0.04) | 0.05(0.05) | 0(0.03) | 0.01(0.04) |  | 0.04(0.02) | 0.03(0) | 0.03(0.01) | -0.01(0.02) | -0.01(0.01) | | 0.04(0.03) | 0.03(0) | 0.03(0.01) | -0.02(0.04) | -0.02(0.04) | | 0.03(0.01) | 0.03(0.02) | 0.07(0.07) | 0(0.02) | 0.04(0.07) |
| 3-back d' | 3.09(0.89) | 3.13(0.95) | 3.2(1.13) | -0.03(0.61) | 0.07(0.59) |  | 3.14(0.73) | 3.69(0.49) | 3.55(0.47) | 0.56(0.63) | -0.14(0.37) | | 3.12(0.6) | 3.48(0.57) | 3.31(0.75) | 0.43(0.52) | -0.18(0.7) |  | 3.27(0.56) | 3.36(0.6) | 3.12(0.89) | 0.09(0.68) | -0.24(0.99) |
| PVT RTs (ms) | 335.31(39.06) | 343.33(55.82) | 321.42(41.08) | 8.07(30.71) | -13.93(23.29) |  | 350.92(58.01) | 339.89(65.3) | 342.74(57.78) | -11.07(67.16) | -8.2(51.78) | | 338.22(54.7) | 338.73(41.89) | 345.4(47.1) | 0.53(26.76) | 7.2(45.94) |  | 372.04(80.41) | 347.44(51.27) | 356.21(53.05) | -24.64(80.58) | -15.93(57.92) |
| PVT Lapse | 2.07(2.4) | 3.71(5.5) | 3.14(3.92) | 1.64(4.22) | 1.07(3.17) |  | 4.6(4.24) | 6.33(5.35) | 5.53(5.63) | 1.73(4.11) | 0.93(3.94) |  | 3.6(4.85) | 3.07(3.95) | 4.13(4.93) | -0.53(2.1) | 0.53(4.39) |  | 4.64(4.63) | 3.29(3.02) | 4.93(5.62) | -1.36(5.79) | 0.29(4.81) |
| PVT 10%FRTs (ms) | 253.31(23.05) | 248.78(44.25) | 233.95(50.64) | -4.5(39.31) | -19.43(46.14) |  | 250.01(56.86) | 222.58(72.66) | 245.96(41.84) | -27.33(62.13) | -4.27(45.4) | | 233.27(41.65) | 235.15(44.01) | 228.56(52.96) | 1.87(14.15) | -4.6(54.33) | | 256.27(44.05) | 248.63(60.09) | 235.44(67.94) | -7.64(29.35) | -20.86(47.99) |
| PVT 10%SRTs (ms) | 480.03(100.71) | 474.32(92.53) | 469(82.66) | -5.79(68.21) | -11(69.9) |  | 499.86(110.88) | 532.53(113.41) | 506.83(99.5) | 32.73(101.7) | 6.87(81.31) | | 484.52(128.55) | 497.5(102.97) | 503.05(109.14) | 13.07(69.91) | 18.53(105.8) | | 544.46(163.45) | 490.02(110.83) | 519.64(114.32) | -54.43(187.42) | -24.79(132) |
| Go Hit Rate | 0.99(0.02) | 0.99(0.01) | 0.99(0.01) | 0(0.02) | 0(0.02) |  | 0.98(0.03) | 0.97(0.05) | 0.98(0.03) | -0.01(0.05) | 0(0.03) |  | 0.99(0.02) | 0.99(0.01) | 0.99(0.01) | 0(0.01) | 0(0.02) |  | 0.98(0.03) | 0.99(0.01) | 0.98(0.02) | 0(0.03) | 0(0.03) |
| Go RTs (ms) | 319.79(27.64) | 312.46(29.59) | 309.92(23.74) | -7.36(25.6) | -9.79(14.94) |  | 332.19(48.81) | 319.53(43.61) | 308.22(41.05) | -12.67(22.91) | -24.07(39.63) | | 325.05(32.74) | 316.71(19.7) | 318.22(26.83) | -8.33(16.03) | -6.67(18.46) | | 329.04(38.59) | 321.86(33.63) | 318.57(31.84) | -7.29(17) | -10.5(25.12) |
| NoGo False Alarm Rate | 0.25(0.12) | 0.28(0.12) | 0.29(0.12) | 0.03(0.09) | 0.04(0.1) |  | 0.3(0.2) | 0.32(0.19) | 0.3(0.22) | 0.01(0.1) | 0(0.16) |  | 0.28(0.17) | 0.28(0.14) | 0.27(0.14) | 0(0.09) | -0.01(0.11) | | 0.3(0.19) | 0.3(0.19) | 0.35(0.17) | 0(0.09) | 0.04(0.12) |
| GoNoGo d' | 3.3(0.77) | 3.17(0.61) | 3.13(0.6) | -0.12(0.68) | -0.17(0.42) |  | 2.98(1.12) | 2.81(1.05) | 2.87(0.99) | -0.17(0.89) | -0.11(0.95) | | 3.04(0.98) | 3.06(0.79) | 3.04(0.76) | 0.03(0.5) | 0(0.72) |  | 3.03(0.81) | 3(0.71) | 2.74(0.71) | -0.03(0.66) | -0.28(0.91) |

Note: 10%FRTs:: 10% fastest reaction time; 10%SRTs: 10% slowest reaction time10%SRTs.


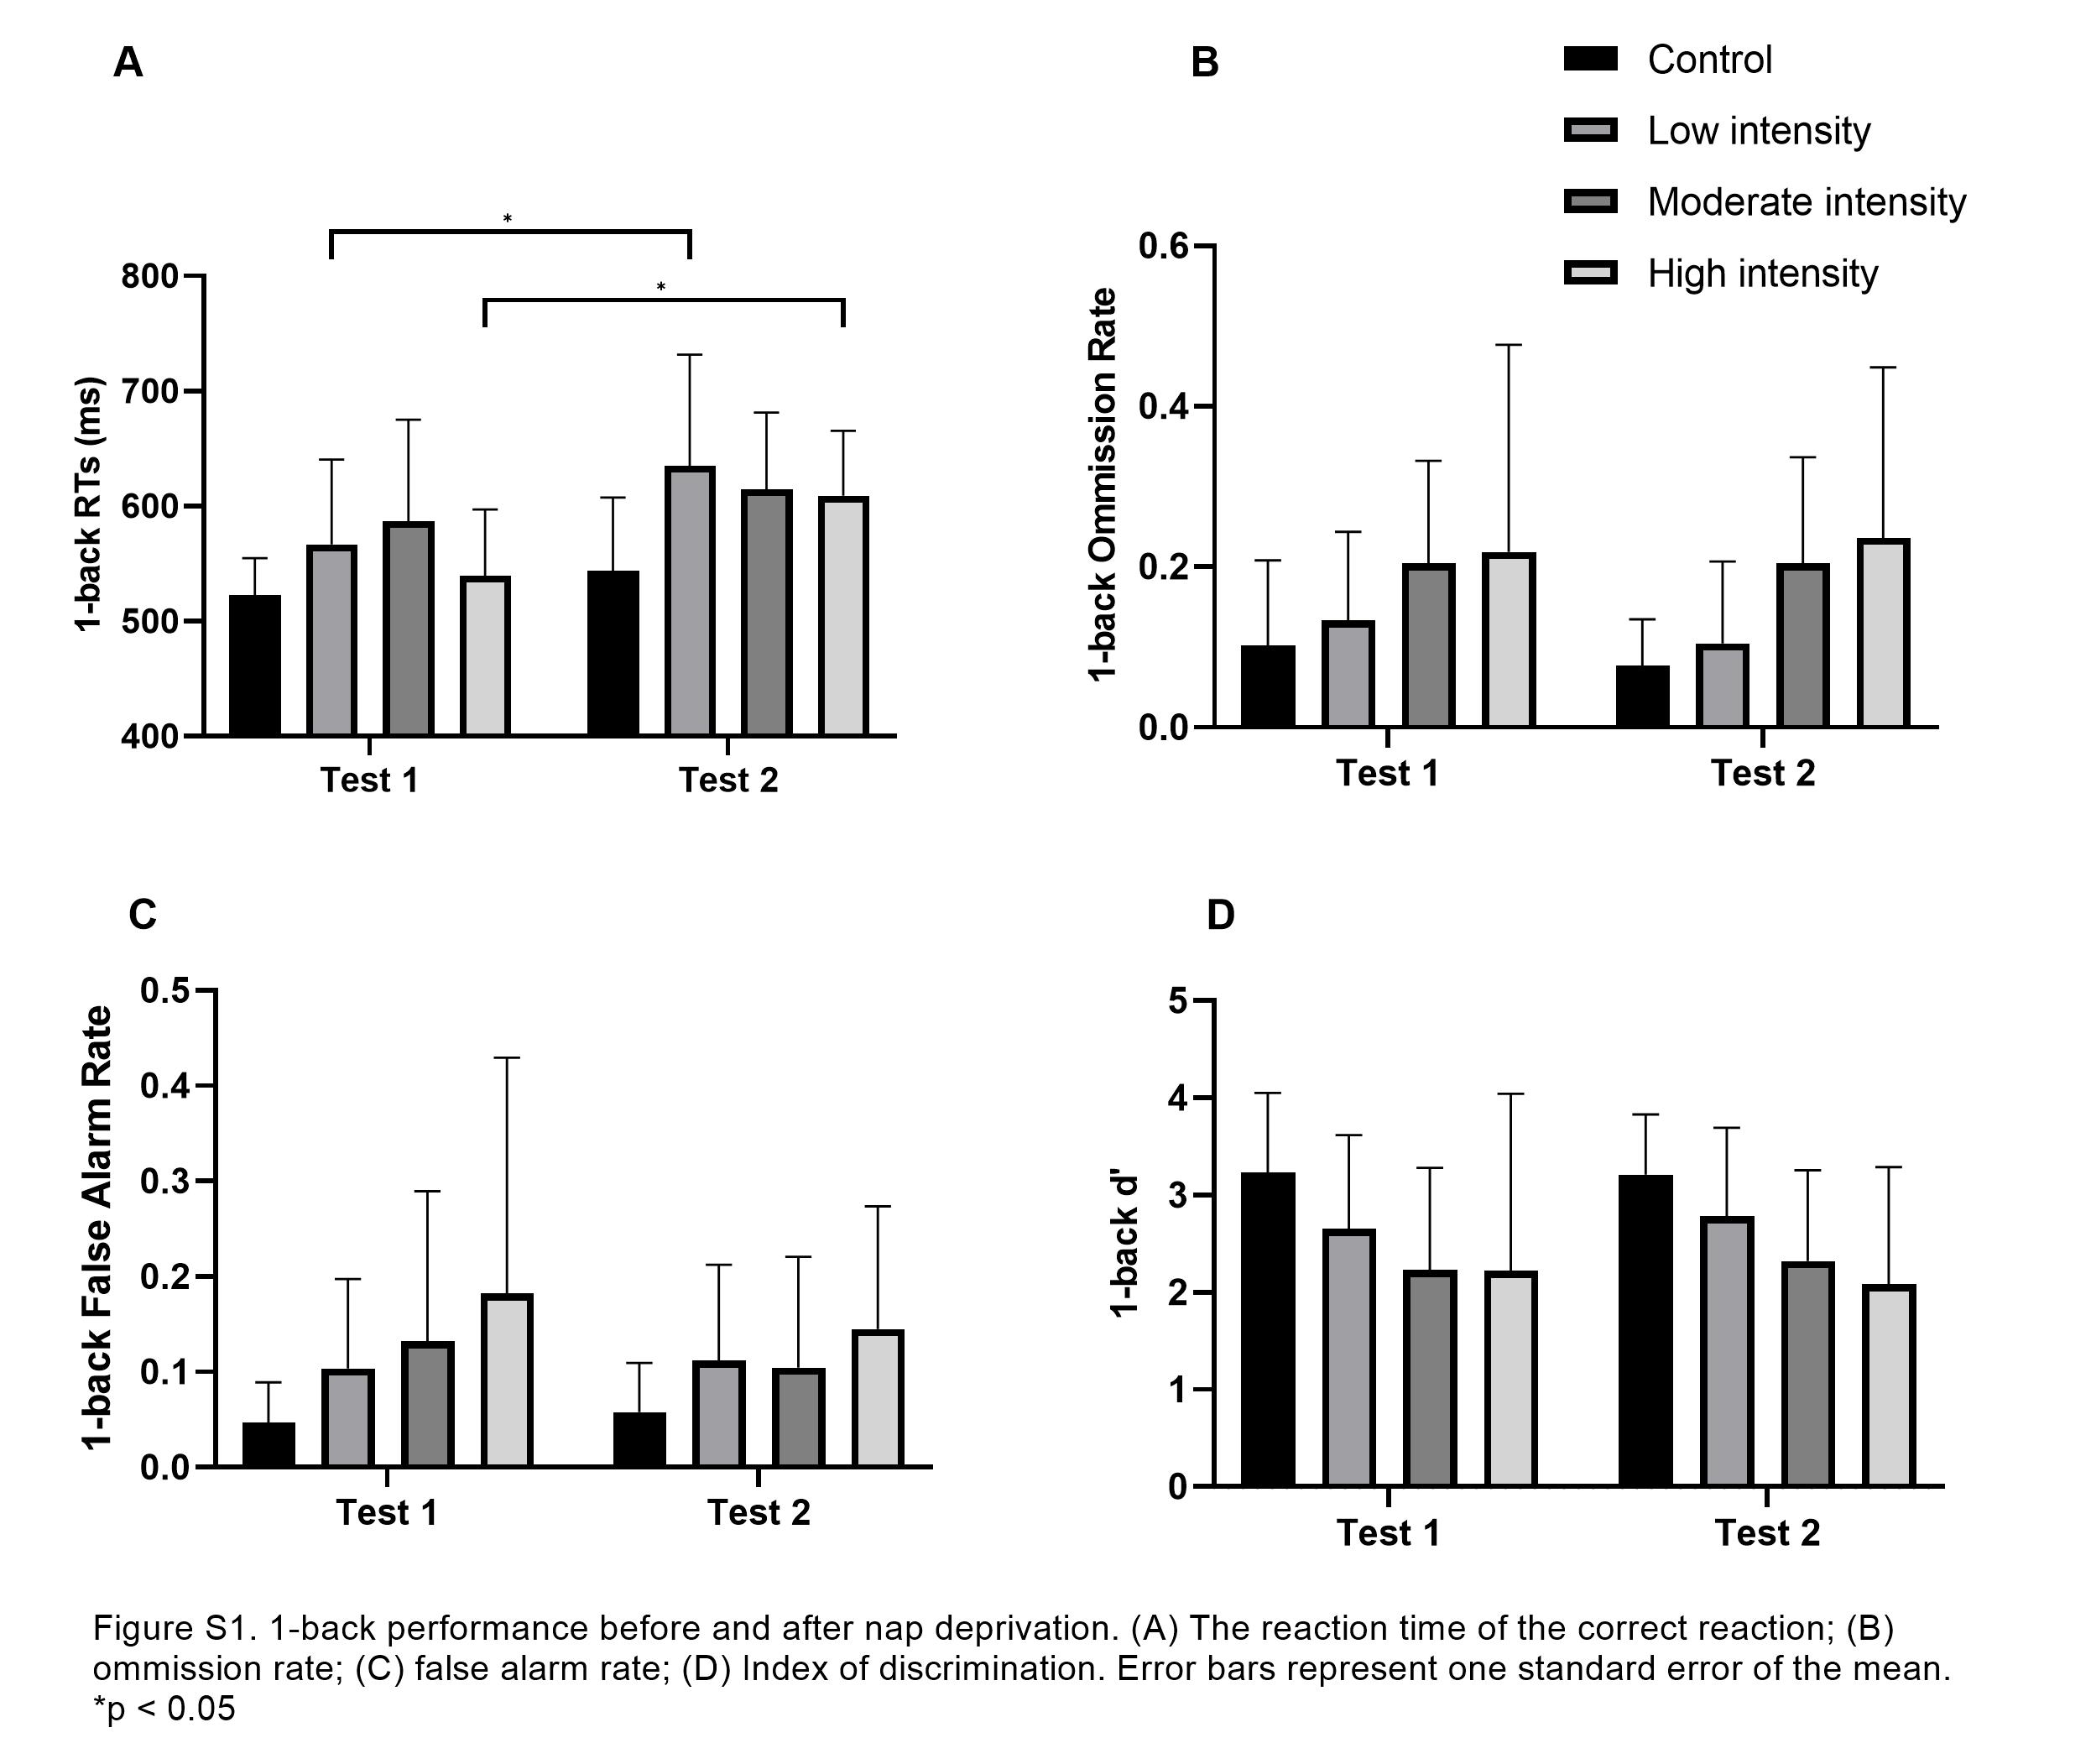

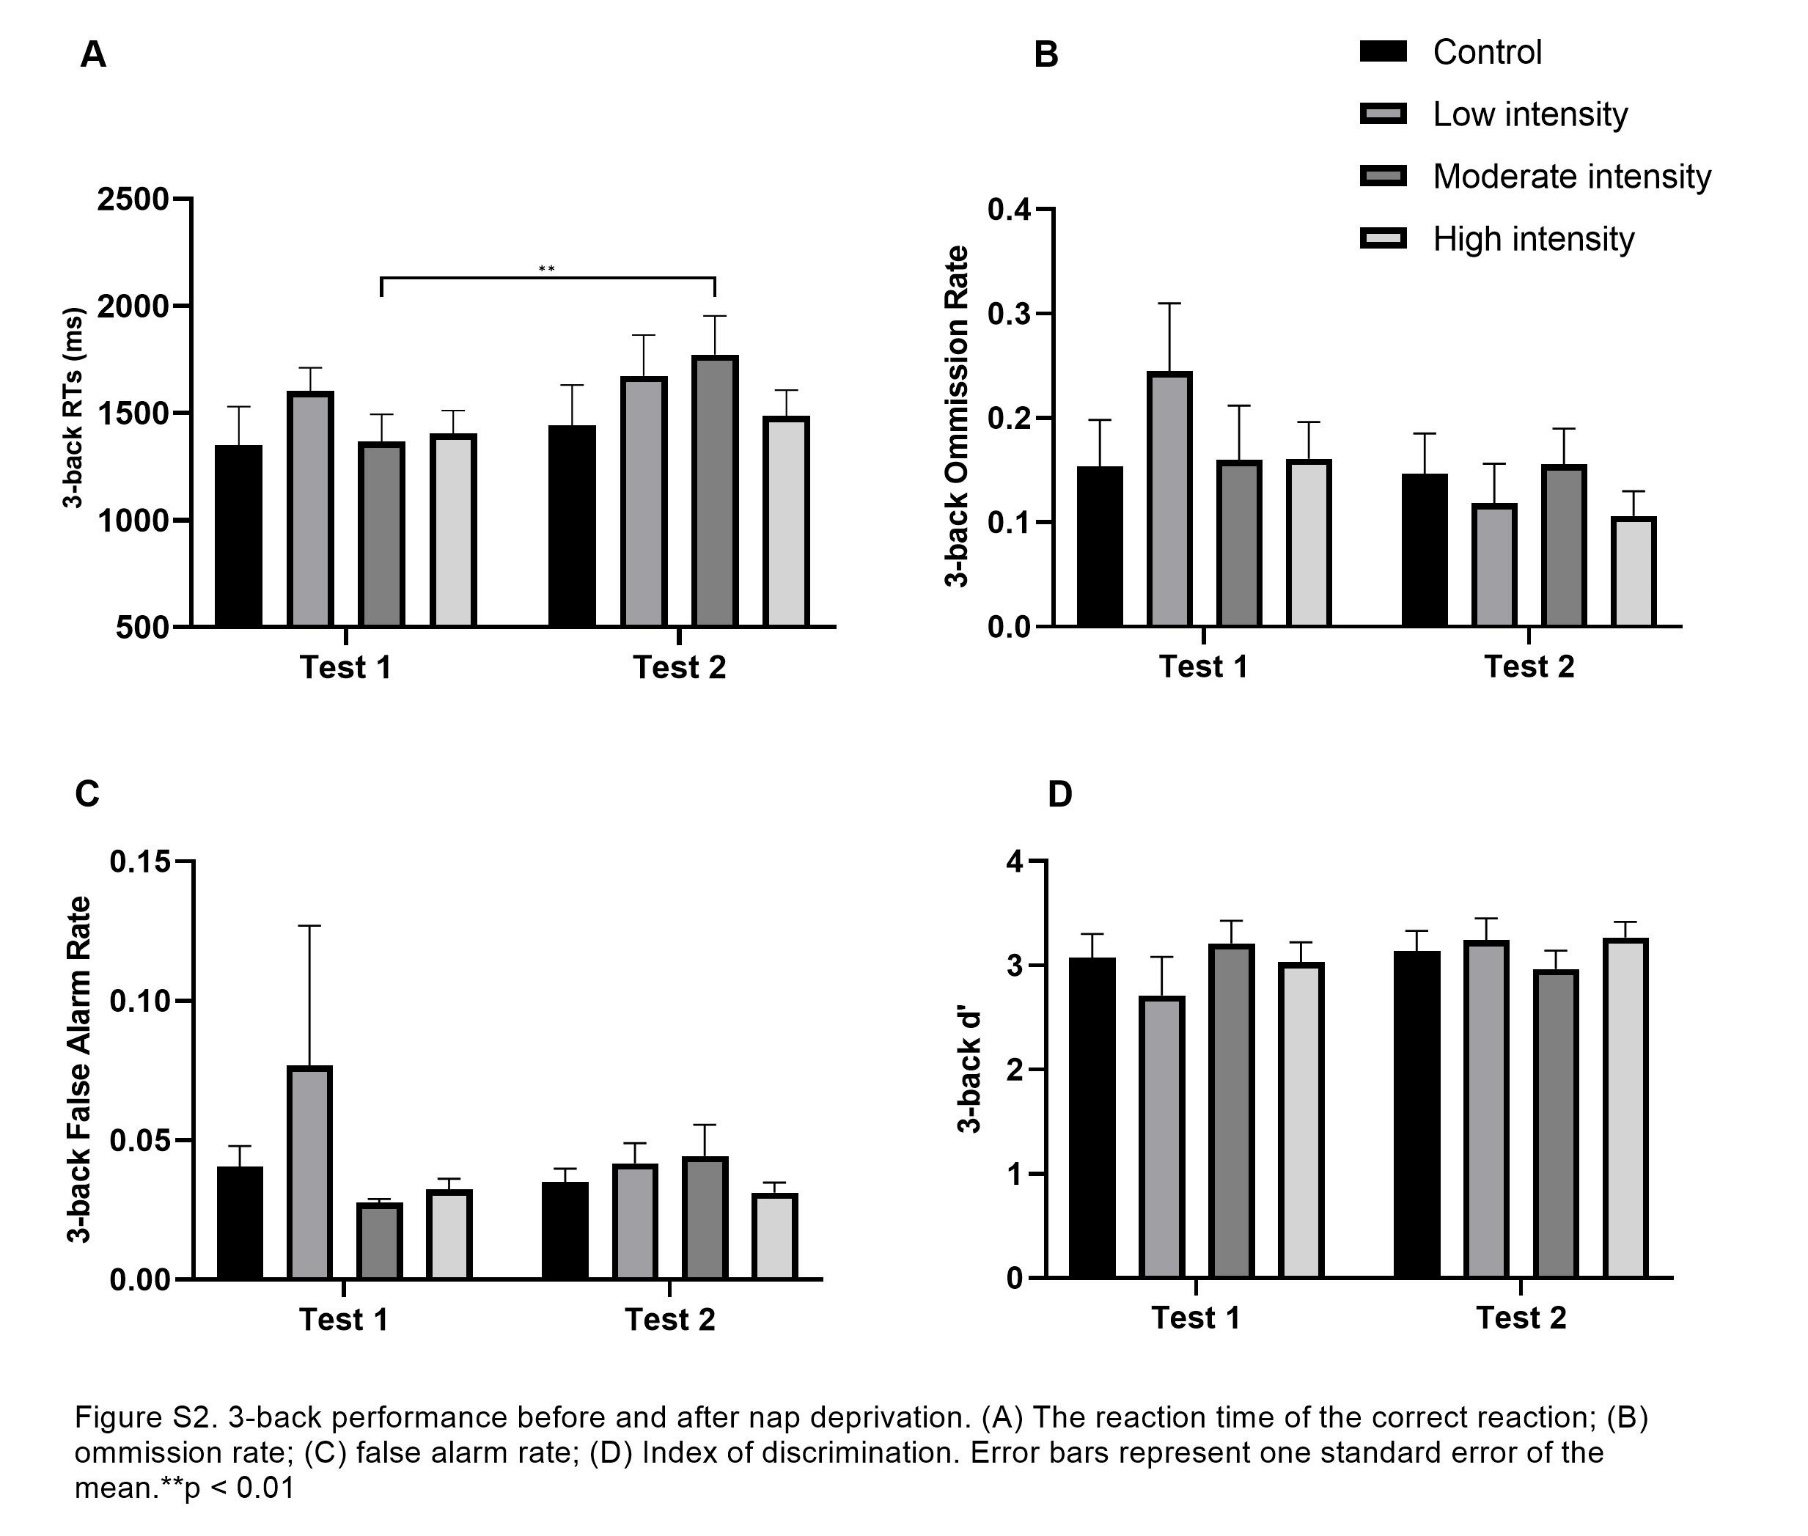

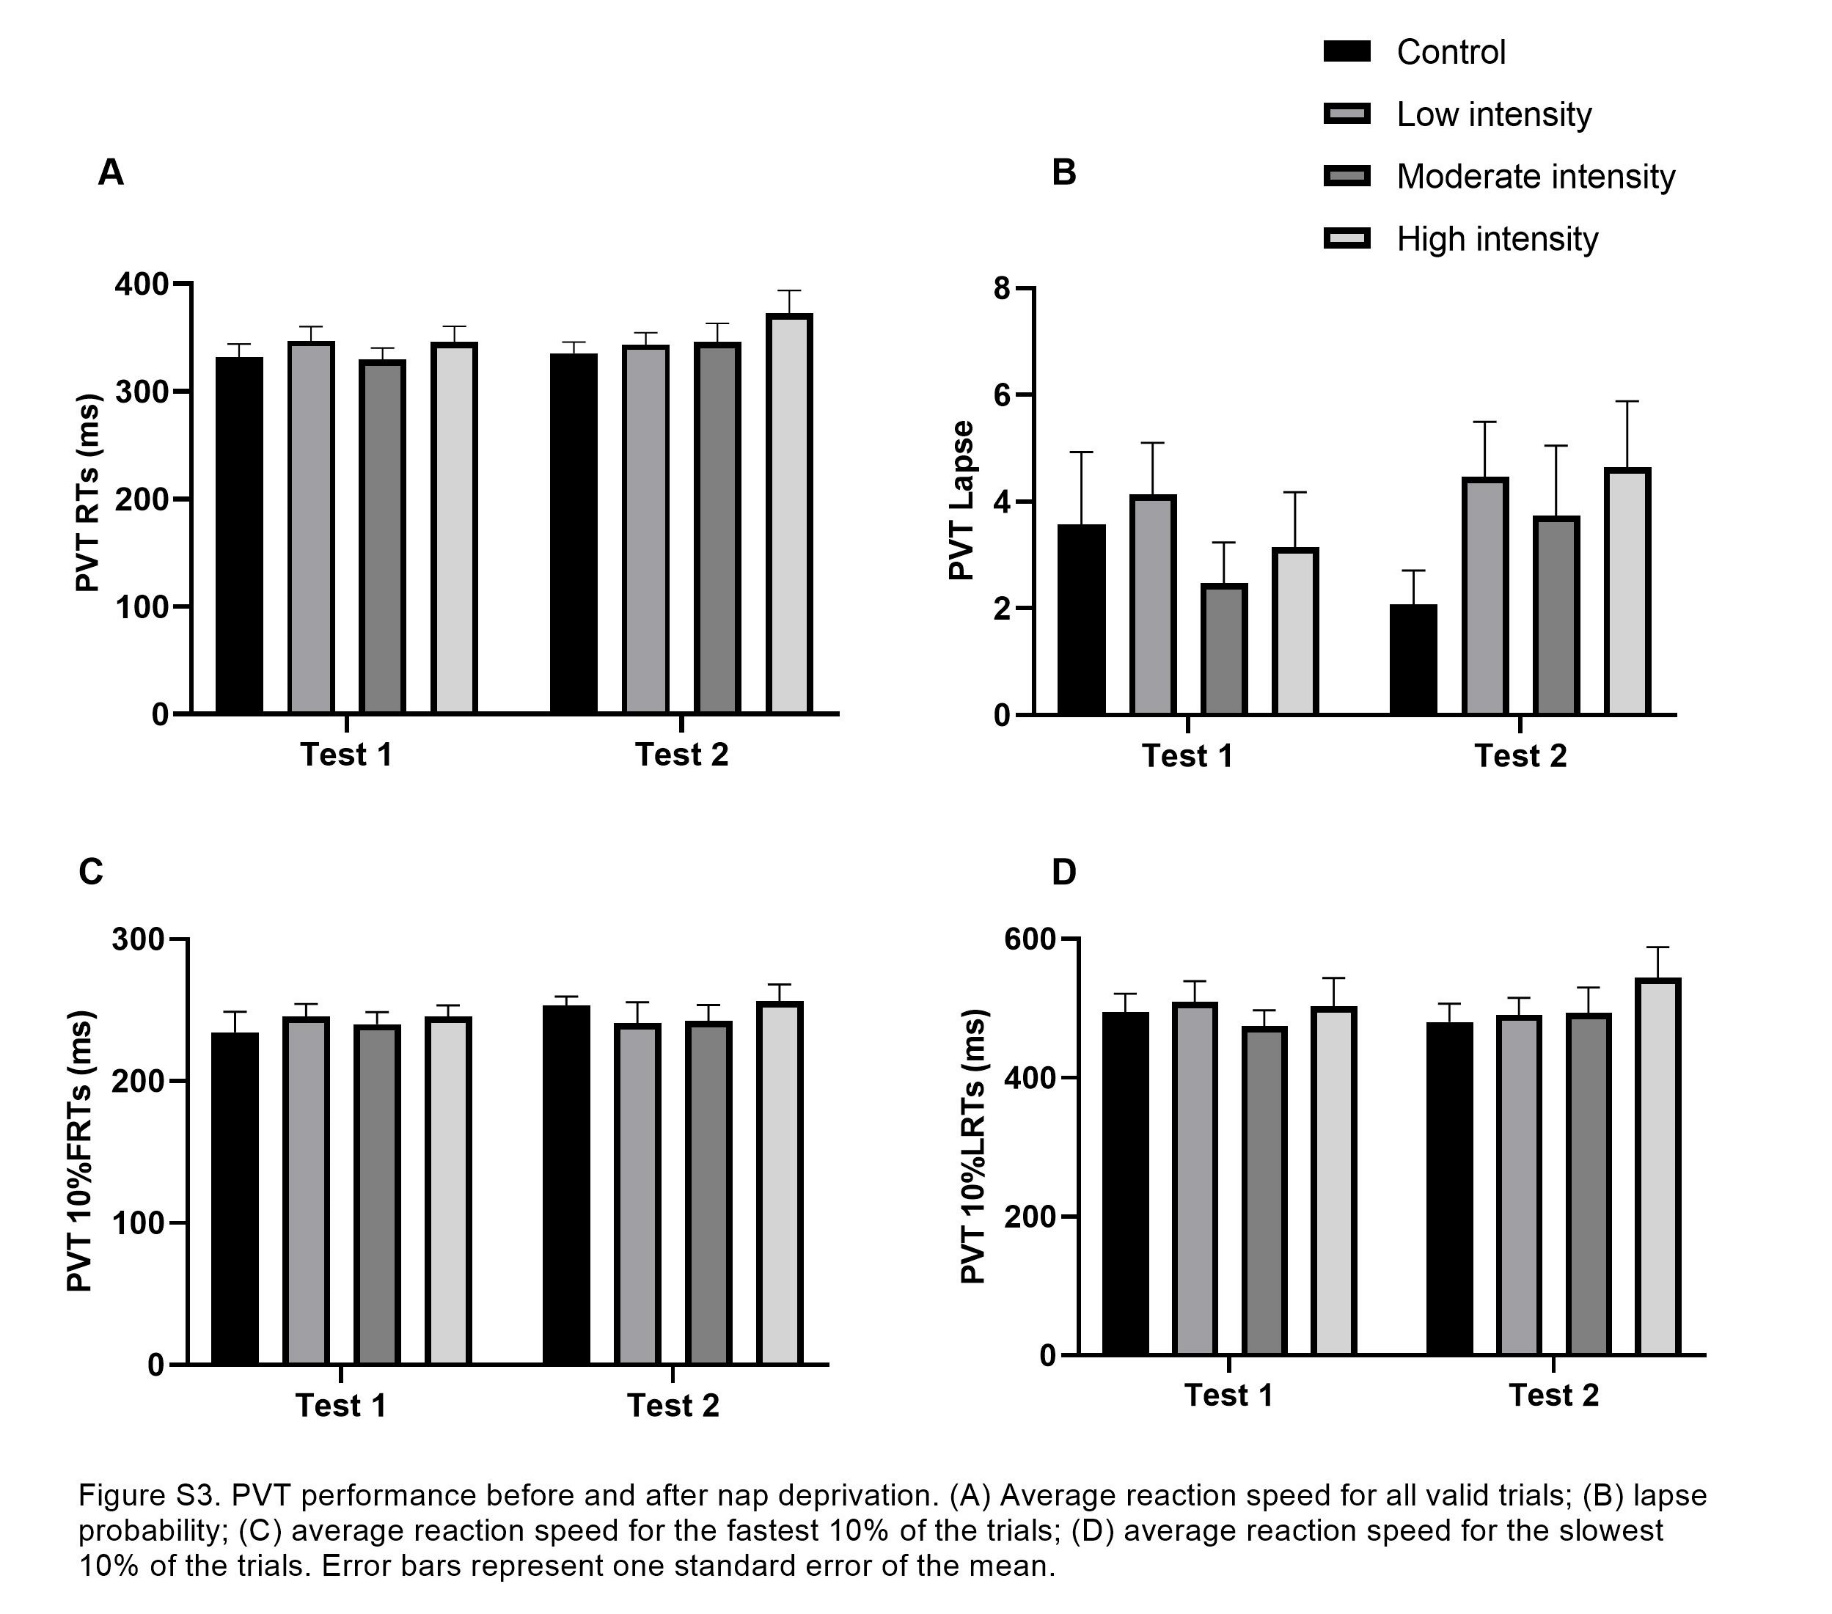

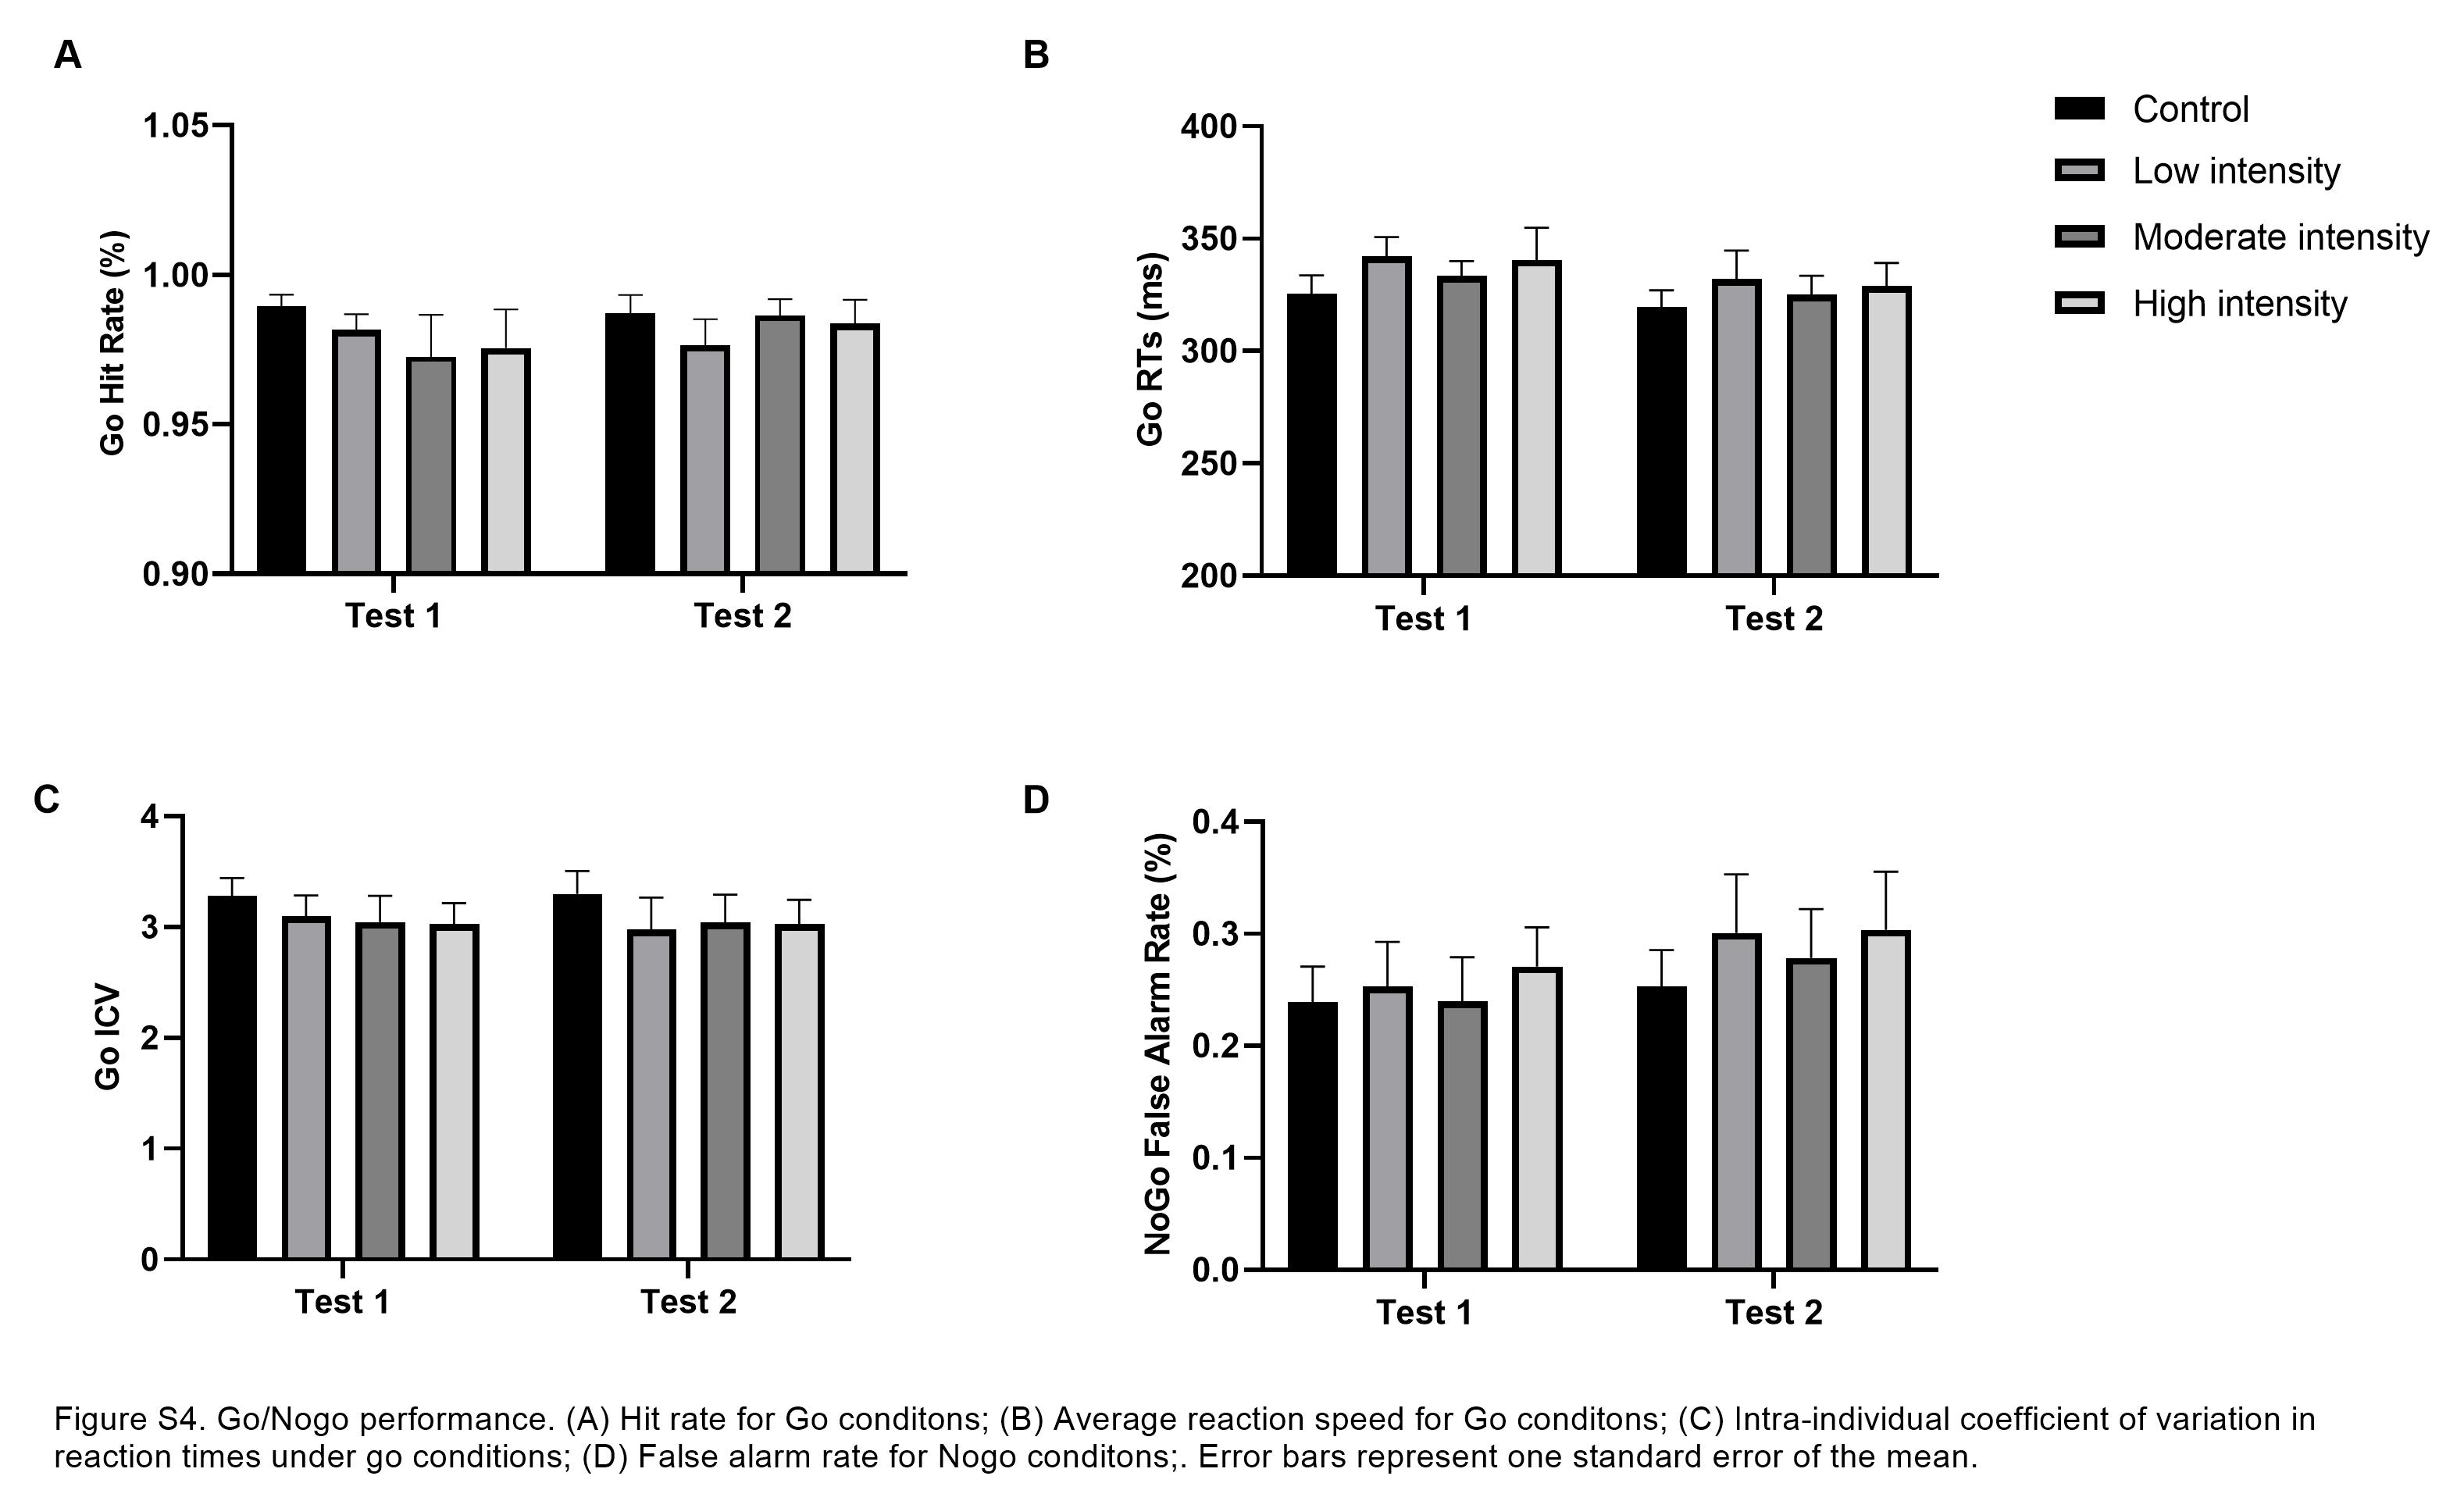

Supplement: Supplementary file 1 [file get_supplementary_file.php]
